# Supplementary material for: Simulation of the Nucleation and Crystal Growth Process in the Laser-Induced Deposition in Solution by a Lattice Boltzmann Method
Source: MDPI journal article supplement (doi:10.3390/nano12183213), 2022-09-16
Supplement: s1 [file s1]

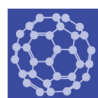

# Simulation of the Nucleation and Crystal Growth Process in the Laser-Induced Deposition in Solution by a Lattice Boltzmann Method

Yongsen He and Siyu Liu \*

School of Mechanical Engineering, Shanghai Jiao Tong University, Shanghai 200240, China

\* Correspondence: liusiyu@sjtu.edu.cn

**Abstract:** A Lattice Boltzmann model is proposed, combining the theories of nucleation and crystal growth for the study of the laser-induced deposition in solution (LIDS). The conjugate heat transfer and the natural convection of the liquid precursor were simulated with the evolving interface of crystal growth. In turn, the morphology of the deposited materials was affected by multiple process parameters, including conditions of chemical precursor and the laser-induced heat and mass transfer. Simulation results indicated that the morphology of deposited materials was mostly affected by the initial concentration of the precursor solution. Specifically, the nonuniformity of thin films was caused by the convection induced by the pulsed-laser, and the surface roughness was due to the competition of local structures for the precursor supply. A relationship of process-condition-material was established, providing guidance of choosing various parameters in LIDS for a desirable morphology of deposited material, facilitating the capabilities of pulsed lasers in precise control in nanomanufacturing.

## TABLE OF CONTENTS

|                                                                                                |   |
|------------------------------------------------------------------------------------------------|---|
| 1 Nucleation Theory and Data Processing Methods.....                                           | 2 |
| 1.1 Nucleation theory.....                                                                     | 2 |
| 1.2 Definition and computational methods of Roughness and Overall trend.....                   | 2 |
| 2 Detailed parameter table.....                                                                | 3 |
| 2.1 Physical and Chemical Parameters.....                                                      | 3 |
| 2.2 Working condition parameters.....                                                          | 4 |
| 3 Simulation results under different working conditions.....                                   | 5 |
| 3.1.1 Roughness, average deposition rate and fluctuation of overall structure of sediment..... | 5 |
| 3.1.2 Cloud map under different conditions.....                                                | 8 |

## 1. Nucleation Theory and Data Processing Methods

### 1.1. Nucleation theory

The nucleation rate formula ( 1 ) in this paper is derived from ref, which represents the nucleation rate of solute C in solution

$$J_0 = 4\pi r^{*2} C_C^2 v \lambda \exp\left(-\frac{\Delta G_U}{kT}\right) \Gamma \exp\left(-\frac{\Delta G^*}{kT}\right) \quad (1)$$

Where  $r^*$  is calculated by equation( 2 ) and is the critical radius of the crystal at the current supersaturation,  $C_C$  is concentration of C(aq),  $v$  is molecular collision frequency,  $\lambda$  is mean free path,  $\Delta G_U$  is the desolvation energy,  $\Gamma$  is Zeldovich factor calculated by equation ( 5 ),  $k$  is the gas constant,  $T$  is temperature,  $\Delta G^*$  is the nucleation energy calculated by equation ( 4 ).( 5 )

$$r^* = \frac{2\sigma v_1}{\Delta\mu} \quad (2)$$

Where  $\sigma$  is surface energy,  $v_1$  is molecular volume,  $\Delta\mu$  is supersaturation, defined by equation:

$$\Delta\mu = kT \ln \frac{C_C}{C_{C_s}} \quad (3)$$

Where  $C_{C_s}$  is the saturation concentration. The nucleation energy  $\Delta G^*$  is:

$$\Delta G^* = \frac{16\pi \sigma^3 v_1^2}{3 \Delta\mu^2} \quad (4)$$

The Zeldovich factor is:

$$\Gamma = \frac{\Delta\mu^2}{8\pi v_1 [\sigma^3 \phi(\theta) kT]^{\frac{1}{2}}} \quad (5)$$

Where  $\phi(\theta) = \frac{1}{4}(1 - \cos\theta)^2(2 + \cos\theta)$  is function of wetting angle  $\theta$ .

### 1.2. Definition and computational methods of Roughness and Overall trend

We extracted the sediment and boundary contour lines from raw calculation data, and then fit the boundary contour lines to obtain a smooth curve that can represent the overall structure of the sediment. According to the obtained curve, the standard deviation is calculated to characterize the local roughness  $R_a$ , and the overall trend  $\varepsilon$  characterizing the overall structure can also be calculated by equation( 6 ), the schematic diagram of the fitting curve and outline is shown in **Error! Reference source not found.** The morphology was characterized by the same method by using different conditions, and the results are shown in SI section 0.

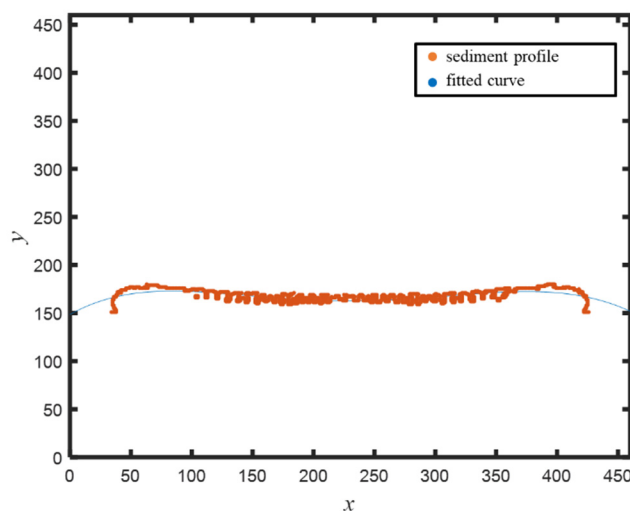

Figure S1. the outline of precipitation and its fit curve.

$$\varepsilon = \frac{y_{left} - y_{mid}}{\min(y_{left}, y_{mid})} \quad (6)$$

where  $y$  is the  $y$ -axis coordinate of the sediment profile fitting curve, and for the bi-modal curve, there are three real extreme values in the calculation area point, the subscripts *left* and *mid* represent the two extreme values in the left and middle of the fitted curve, respectively. For the unimodal curve, there is only one extreme point, so the subscript *left* represents the leftmost value of the actual sediment. This value represents the overall trend of the sediment morphology. The larger the absolute value, the greater the fluctuation and the negative value indicates that the sediment is a single peak structure.

## 2. Detailed parameter table

### 2.1. Physical and Chemical Parameters

Table S1. Physical and Chemical Parameters.

| Parameter name                         | symbol    | unit                                                 | value    | Parameter name                                  | symbol   | unit                                                | value    |
|----------------------------------------|-----------|------------------------------------------------------|----------|-------------------------------------------------|----------|-----------------------------------------------------|----------|
| Scale Factor of time                   | $C_t$     | s                                                    | 1.99E-08 | Molar mass of silicon                           | $m_1$    | $\text{kg} \cdot \text{mol}^{-1}$                   | 0.028    |
| Scale Factor of length                 | $C_L$     | m                                                    | 8.70E-07 | Density of copper                               | $\rho_2$ | $\text{kg} \cdot \text{m}^{-3}$                     | 8960     |
| Scale Factor of density                | $C_\rho$  | $\text{kg} \cdot \text{m}^{-3}$                      | 199.82   | Thermal conductivity of copper                  | $k_2$    | $\text{W} \cdot \text{m}^{-1} \cdot \text{K}^{-1}$  | 401      |
| Scale Factor of temperature            | $C_T$     | K                                                    | 28.815   | Specific heat capacity of copper                | $c_2$    | $\text{J} \cdot \text{kg}^{-1} \cdot \text{K}^{-1}$ | 390      |
| Scale Factor of amount of substance    | $C_{mol}$ | mol                                                  | 1.00E-06 | Molar mass of copper                            | $m_2$    | $\text{kg} \cdot \text{mol}^{-1}$                   | 0.064    |
| Simulation area length                 | $L$       | m                                                    | 0.0004   | Diffusion coefficient                           | $D$      | $\text{m}^2 \cdot \text{s}^{-1}$                    | 1.00E-06 |
| Gas constant                           | $R$       | $\text{J} \cdot \text{mol}^{-1} \cdot \text{K}^{-1}$ | 8.314    | Homogeneous Reaction Activation Energy          | $E_{a1}$ | $\text{J} \cdot \text{mol}^{-1}$                    | 80000    |
| laser pulse repetition rate            | $Rep$     | Hz                                                   | 50000    | Chemical reaction rate constant                 | $a_1$    |                                                     | 3.80E+09 |
| Laser pulse width                      | $w$       | s                                                    | 1.00E-07 | The saturation concentration of copper in water | $C_{s2}$ | $\text{mol} \cdot \text{m}^{-3}$                    | 8.00E-16 |
| Laser peak power                       | $P$       | $\text{W} \cdot \text{m}^{-3}$                       | 1.11E+09 | Growth barrier                                  | $E_{a2}$ | $\text{J} \cdot \text{mol}^{-1}$                    | 70000    |
| Density of water                       | $\rho_0$  | $\text{kg} \cdot \text{m}^{-3}$                      | 999.1    | growth constant                                 | $a_2$    |                                                     | 1.00E+09 |
| Thermal conductivity of water          | $k_0$     | $\text{kg} \cdot \text{m}^{-3}$                      | 0.62     | Contact angle                                   | $\theta$ | rad                                                 | 0.15     |
| Thermal expansion coefficient of water | $\beta_0$ | —                                                    | 0.00289  | diffusion barrier                               | $E_u$    | $\text{J} \cdot \text{mol}^{-1}$                    | 80000    |
| Specific heat capacity of water        | $c_0$     | $\text{J} \cdot \text{kg}^{-1} \cdot \text{K}^{-1}$  | 4189     | Molecular Collision Frequency                   | $\omega$ | Hz                                                  | 2.00E+13 |

|                                   |          |                                                     |            |                                           |          |                                  |          |
|-----------------------------------|----------|-----------------------------------------------------|------------|-------------------------------------------|----------|----------------------------------|----------|
| Molar mass of water               | $m_0$    | $\text{kg} \cdot \text{mol}^{-1}$                   | 0.018      | Molecular mean free path                  | $l_0$    | m                                | 3.00E-10 |
| Dynamic viscosity of water        | $\mu$    | $\text{N} \cdot \text{s} \cdot \text{m}^{-2}$       | 0.00113757 | molecular volume                          | $v_0$    | $\text{m}^3$                     | 1.41E-29 |
| Density of silicon                | $\rho_1$ | $\text{kg} \cdot \text{m}^{-3}$                     | 2330       | Copper-Silicon-Water Surface Energy       | $\sigma$ | $\text{J} \cdot \text{m}^{-2}$   | 0.1      |
| Thermal conductivity of silicon   | $k_1$    | $\text{W} \cdot \text{m}^{-1} \cdot \text{K}^{-1}$  | 149        | Laser penetration depth                   | $l_p$    |                                  | 50       |
| Specific heat capacity of silicon | $c_1$    | $\text{J} \cdot \text{kg}^{-1} \cdot \text{K}^{-1}$ | 706.75     | Initial concentration of reactants A or B | $C_0$    | $\text{J} \cdot \text{mol}^{-1}$ | 10000    |

## 2.2. Working condition parameters

**Table S2.** condition name and its detailed parameters.

| Condition number | $D$      | $E_a$  | $E_b$  | $\theta$ | $E_d$  | $\sigma$ | $C0$ |
|------------------|----------|--------|--------|----------|--------|----------|------|
| 1                | 1.00E-06 | 60000  | 70000  | 0.15     | 80000  | 0.1      | 1000 |
| 2                | 1.00E-06 | 80000  | 70000  | 0.15     | 80000  | 0.1      | 1000 |
| 3                | 1.00E-06 | 70000  | 70000  | 0.15     | 80000  | 0.1      | 1000 |
| 4                | 1.00E-06 | 70000  | 70000  | 0.15     | 80000  | 0.15     | 1000 |
| 5                | 1.00E-06 | 70000  | 70000  | 0.15     | 80000  | 0.2      | 1000 |
| 6                | 1.00E-06 | 70000  | 70000  | 0.15     | 80000  | 0.3      | 1000 |
| 7                | 1.00E-06 | 70000  | 70000  | 0.15     | 80000  | 0.4      | 1000 |
| 8                | 1.00E-06 | 70000  | 70000  | 0.15     | 80000  | 0.5      | 1000 |
| 9                | 1.00E-06 | 70000  | 70000  | 0.15     | 80000  | 0.1      | 500  |
| 10               | 1.00E-06 | 70000  | 70000  | 0.15     | 10000  | 0.1      | 500  |
| 11               | 1.00E-06 | 70000  | 70000  | 0.15     | 100000 | 0.1      | 500  |
| 12               | 1.00E-06 | 70000  | 70000  | 0.15     | 60000  | 0.1      | 500  |
| 13               | 1.00E-06 | 70000  | 70000  | 0.15     | 50000  | 0.1      | 500  |
| 14               | 1.00E-06 | 70000  | 70000  | 0.15     | 80000  | 0.1      | 100  |
| 15               | 1.00E-06 | 70000  | 70000  | 0.15     | 80000  | 0.1      | 50   |
| 16               | 1.00E-06 | 70000  | 70000  | 0.15     | 80000  | 0.1      | 200  |
| 17               | 1.00E-06 | 70000  | 70000  | 0.15     | 80000  | 0.1      | 300  |
| 18               | 1.00E-06 | 70000  | 70000  | 0.05     | 80000  | 0.1      | 500  |
| 19               | 1.00E-06 | 70000  | 70000  | 0.02     | 80000  | 0.1      | 500  |
| 20               | 1.00E-06 | 70000  | 70000  | 0.2      | 80000  | 0.1      | 500  |
| 21               | 1.00E-06 | 70000  | 70000  | 0.25     | 80000  | 0.1      | 500  |
| 22               | 1.00E-06 | 100000 | 70000  | 0.15     | 80000  | 0.1      | 1000 |
| 23               | 1.00E-06 | 120000 | 70000  | 0.15     | 80000  | 0.1      | 1000 |
| 24               | 1.00E-06 | 70000  | 100000 | 0.1      | 80000  | 0.1      | 500  |
| 25               | 1.00E-06 | 70000  | 120000 | 0.1      | 80000  | 0.1      | 500  |
| 26               | 1.00E-06 | 70000  | 140000 | 0.1      | 80000  | 0.1      | 500  |
| 27               | 1.00E-06 | 70000  | 60000  | 0.1      | 80000  | 0.1      | 500  |
| 28               | 1.00E-06 | 70000  | 40000  | 0.1      | 80000  | 0.1      | 500  |
| 29               | 1.00E-06 | 70000  | 20000  | 0.1      | 80000  | 0.1      | 500  |
| 30               | 3.00E-08 | 80000  | 70000  | 0.15     | 80000  | 0.1      | 1000 |
| 31               | 1.00E-04 | 120000 | 70000  | 0.15     | 80000  | 0.1      | 1000 |
| 32               | 5.00E-06 | 70000  | 70000  | 0.1      | 80000  | 0.1      | 500  |
| 33               | 1.00E-05 | 70000  | 70000  | 0.1      | 80000  | 0.1      | 500  |
| 34               | 5.00E-05 | 70000  | 70000  | 0.1      | 80000  | 0.1      | 500  |
| 35               | 1.00E-07 | 70000  | 70000  | 0.1      | 80000  | 0.1      | 500  |

|    |          |       |       |     |       |     |     |
|----|----------|-------|-------|-----|-------|-----|-----|
| 36 | 1.00E-08 | 70000 | 70000 | 0.1 | 80000 | 0.1 | 500 |
| 37 | 5.00E-09 | 70000 | 70000 | 0.1 | 80000 | 0.1 | 500 |

### 3. Simulation results under different working conditions

#### 3.1.1. Roughness, average deposition rate and fluctuation of overall structure of sediment

**Table S3.** Sediment morphology parameter values under different conditions.

| Condition number | Time steps | $R_a$   | $\varepsilon$ | $R_G$   | Condition number | Time steps | $R_a$  | $\varepsilon$ | $R_G$   |
|------------------|------------|---------|---------------|---------|------------------|------------|--------|---------------|---------|
| 1                | 100000     | 4997.12 | -0.03         | 0.52841 | 19               | 100000     | 5.48   | 0.17          | 0.00777 |
|                  | 200000     | 1666.79 | 1.82          |         |                  | 200000     | 10.22  | 0.34          |         |
|                  | 300000     | 1521.05 | 2.22          |         |                  | 300000     | 14.02  | 0.54          |         |
|                  | 400000     | 1480.72 | 2.31          |         |                  | 400000     | 25.01  | 0.62          |         |
|                  | 500000     | 1461.19 | 2.30          |         |                  | 500000     | 36.76  | 0.73          |         |
|                  | 600000     | 1449.23 | 2.35          |         |                  | 600000     | 48.47  | 0.91          |         |
|                  | 700000     | 1451.74 | 2.25          |         |                  | 700000     | 62.70  | 1.03          |         |
|                  | 800000     | 1440.82 | 2.33          |         |                  | 800000     | 79.91  | 1.24          |         |
|                  | 900000     | 1454.85 | 2.14          |         |                  | 900000     | 106.89 | 1.43          |         |
| 2                | 100000     | 9.34    | 0.22          | 0.01565 | 20               | 100000     | 5.48   | 0.17          | 0.00777 |
|                  | 200000     | 30.03   | 0.35          |         |                  | 200000     | 10.22  | 0.34          |         |
|                  | 300000     | 57.86   | 0.52          |         |                  | 300000     | 14.05  | 0.54          |         |
|                  | 400000     | 96.07   | 0.66          |         |                  | 400000     | 24.94  | 0.63          |         |
|                  | 500000     | 147.82  | 0.76          |         |                  | 500000     | 36.81  | 0.74          |         |
|                  | 600000     | 195.93  | 0.88          |         |                  | 600000     | 48.37  | 0.92          |         |
|                  | 700000     | 256.61  | 1.01          |         |                  | 700000     | 62.86  | 1.03          |         |
|                  | 800000     | 330.57  | 1.10          |         |                  | 800000     | 81.52  | 1.25          |         |
|                  | 900000     | 415.35  | 1.09          |         |                  | 900000     | 108.30 | 1.44          |         |
| 3                | 100000     | 9.78    | 0.22          | 0.01952 | 21               | 100000     | 5.48   | 0.17          | 0.00777 |
|                  | 200000     | 28.94   | 0.38          |         |                  | 200000     | 10.22  | 0.34          |         |
|                  | 300000     | 60.35   | 0.58          |         |                  | 300000     | 14.02  | 0.54          |         |
|                  | 400000     | 107.24  | 0.80          |         |                  | 400000     | 24.91  | 0.63          |         |
|                  | 500000     | 161.87  | 1.04          |         |                  | 500000     | 36.83  | 0.73          |         |
|                  | 600000     | 236.02  | 1.31          |         |                  | 600000     | 48.31  | 0.92          |         |
|                  | 700000     | 318.44  | 1.55          |         |                  | 700000     | 63.01  | 1.04          |         |
|                  | 800000     | 450.96  | 1.89          |         |                  | 800000     | 81.41  | 1.24          |         |
|                  | 900000     | 701.68  | 2.69          |         |                  | 900000     | 107.99 | 1.45          |         |
| 4                | 100000     | 9.79    | 0.22          | 0.01961 | 22               | 100000     | 9.48   | 0.19          | 0.01103 |
|                  | 200000     | 29.11   | 0.36          |         |                  | 200000     | 23.05  | 0.34          |         |
|                  | 300000     | 60.08   | 0.57          |         |                  | 300000     | 52.36  | 0.55          |         |
|                  | 400000     | 107.14  | 0.79          |         |                  | 400000     | 94.27  | 0.69          |         |
|                  | 500000     | 161.43  | 1.03          |         |                  | 500000     | 148.44 | 0.76          |         |
|                  | 600000     | 234.64  | 1.28          |         |                  | 600000     | 214.90 | 0.81          |         |
|                  | 700000     | 317.21  | 1.53          |         |                  | 700000     | 288.88 | 0.83          |         |
|                  | 800000     | 452.12  | 1.91          |         |                  | 800000     | 376.39 | 0.83          |         |
|                  | 900000     | 701.93  | 2.77          |         |                  | 900000     | 473.94 | 0.89          |         |
| 5                | 100000     | 9.78    | 0.22          | 0.01961 | 23               | 100000     | 4.99   | 0.04          | 0.00914 |
|                  | 200000     | 28.97   | 0.37          |         |                  | 200000     | 13.67  | 0.15          |         |

|    |        |        |      |         |    |        |         |       |         |
|----|--------|--------|------|---------|----|--------|---------|-------|---------|
|    | 300000 | 60.01  | 0.57 |         |    | 300000 | 29.50   | 0.29  |         |
|    | 400000 | 107.83 | 0.78 |         |    | 400000 | 58.82   | 0.41  |         |
|    | 500000 | 161.52 | 1.02 |         |    | 500000 | 104.09  | 0.49  |         |
|    | 600000 | 234.80 | 1.29 |         |    | 600000 | 161.12  | 0.57  |         |
|    | 700000 | 317.28 | 1.49 |         |    | 700000 | 234.92  | 0.63  |         |
|    | 800000 | 454.35 | 1.88 |         |    | 800000 | 327.02  | 0.72  |         |
|    | 900000 | 703.43 | 2.68 |         |    | 900000 | 440.70  | 0.75  |         |
| 6  | 100000 | 9.82   | 0.22 | 0.01963 | 24 | 100000 | 3.05    | 0.07  | 0.00548 |
|    | 200000 | 28.92  | 0.38 |         |    | 200000 | 5.32    | 0.10  |         |
|    | 300000 | 59.91  | 0.57 |         |    | 300000 | 7.62    | 0.28  |         |
|    | 400000 | 108.10 | 0.77 |         |    | 400000 | 12.51   | 0.28  |         |
|    | 500000 | 161.72 | 1.02 |         |    | 500000 | 16.31   | 0.45  |         |
|    | 600000 | 234.58 | 1.29 |         |    | 600000 | 19.77   | 0.56  |         |
|    | 700000 | 318.46 | 1.52 |         |    | 700000 | 24.87   | 0.65  |         |
|    | 800000 | 452.58 | 1.93 |         |    | 800000 | 32.02   | 0.74  |         |
|    | 900000 | 702.27 | 2.79 |         |    | 900000 | 39.60   | 0.87  |         |
| 7  | 100000 | 9.79   | 0.22 | 0.01968 | 25 | 100000 | 3.04    | -1.64 | 0.00416 |
|    | 200000 | 28.95  | 0.37 |         |    | 200000 | 4.00    | -4.18 |         |
|    | 300000 | 59.80  | 0.55 |         |    | 300000 | 4.17    | -4.79 |         |
|    | 400000 | 107.51 | 0.75 |         |    | 400000 | 4.98    | 0.05  |         |
|    | 500000 | 161.51 | 0.99 |         |    | 500000 | 10.10   | 0.06  |         |
|    | 600000 | 234.05 | 1.29 |         |    | 600000 | 19.48   | 0.12  |         |
|    | 700000 | 313.78 | 1.54 |         |    | 700000 | 35.26   | 0.07  |         |
|    | 800000 | 449.15 | 1.98 |         |    | 800000 | 59.19   | 0.02  |         |
|    | 900000 | 696.57 | 2.80 |         |    | 900000 | 86.81   | -0.94 |         |
| 8  | 100000 | 9.79   | 0.22 | 0.01968 | 27 | 100000 | 5.83    | 0.16  | 0.00825 |
|    | 200000 | 29.10  | 0.36 |         |    | 200000 | 13.56   | 0.32  |         |
|    | 300000 | 59.50  | 0.54 |         |    | 300000 | 22.67   | 0.60  |         |
|    | 400000 | 106.82 | 0.74 |         |    | 400000 | 35.19   | 0.79  |         |
|    | 500000 | 160.81 | 0.98 |         |    | 500000 | 50.66   | 0.96  |         |
|    | 600000 | 234.26 | 1.23 |         |    | 600000 | 68.00   | 1.18  |         |
|    | 700000 | 316.18 | 1.48 |         |    | 700000 | 90.59   | 1.38  |         |
|    | 800000 | 453.50 | 1.90 |         |    | 800000 | 120.71  | 1.60  |         |
|    | 900000 | 705.43 | 2.74 |         |    | 900000 | 148.75  | 1.84  |         |
| 9  | 100000 | 5.48   | 0.17 | 0.01968 | 28 | 100000 | 1985.32 | -0.42 | 2.17482 |
|    | 200000 | 10.22  | 0.34 |         |    | 200000 | 2213.93 | -0.42 |         |
|    | 300000 | 14.06  | 0.54 |         |    | 300000 | 2438.85 | -0.42 |         |
|    | 400000 | 24.95  | 0.63 |         |    | 400000 | 2433.63 | -0.46 |         |
|    | 500000 | 36.83  | 0.73 |         |    | 500000 | 2446.49 | -0.47 |         |
|    | 600000 | 48.37  | 0.92 |         |    | 600000 | 2448.14 | -0.49 |         |
|    | 700000 | 62.86  | 1.04 |         |    | 700000 | 2453.45 | -0.51 |         |
|    | 800000 | 80.35  | 1.25 |         |    | 800000 | 2453.26 | -0.51 |         |
|    | 900000 | 106.78 | 1.43 |         |    | 900000 | 2460.62 | -0.51 |         |
| 11 | 100000 | 5.55   | 0.18 | 0.01968 | 30 | 100000 | 0.00    | 0.00  | 0.00123 |
|    | 200000 | 10.34  | 0.34 |         |    | 200000 | 9.42    | 0.26  |         |
|    | 300000 | 14.25  | 0.55 |         |    | 300000 | 10.33   | 0.41  |         |
|    | 400000 | 24.97  | 0.61 |         |    | 400000 | 18.10   | 0.37  |         |
|    | 500000 | 36.62  | 0.72 |         |    | 500000 | 20.30   | 0.35  |         |

|    |        |        |      |         |        |        |         |        |         |
|----|--------|--------|------|---------|--------|--------|---------|--------|---------|
|    | 600000 | 48.84  | 0.90 |         |        | 600000 | 21.40   | 0.25   |         |
|    | 700000 | 61.55  | 1.05 |         |        | 700000 | 29.08   | 0.21   |         |
|    | 800000 | 80.83  | 1.21 |         |        | 800000 | 31.85   | 0.22   |         |
|    | 900000 | 106.01 | 1.36 |         |        | 900000 | 35.07   | 0.19   |         |
| 12 | 100000 | 5.48   | 0.17 | 0.01968 | 31     | 100000 | 17.92   | 0.09   | 0.26951 |
|    | 200000 | 10.22  | 0.34 |         |        | 200000 | 113.80  | 0.16   |         |
|    | 300000 | 14.02  | 0.54 |         |        | 300000 | 752.23  | -2.98  |         |
|    | 400000 | 25.01  | 0.62 |         |        | 400000 | 1749.81 | -2.02  |         |
|    | 500000 | 36.76  | 0.73 |         |        | 500000 | 3458.01 | 0.04   |         |
|    | 600000 | 48.44  | 0.92 |         |        | 600000 | 2360.50 | 8.25   |         |
|    | 700000 | 62.76  | 1.03 |         |        | 700000 | 2263.90 | 9.28   |         |
|    | 800000 | 79.93  | 1.24 |         |        | 800000 | 2258.48 | 9.45   |         |
|    | 900000 | 106.97 | 1.43 |         |        | 900000 | 2226.72 | 9.59   |         |
| 13 | 100000 | 5.48   | 0.17 | 0.01968 | 32     | 100000 | 9.34    | 0.42   | 0.26951 |
|    | 200000 | 10.22  | 0.34 |         |        | 200000 | 27.60   | 0.79   |         |
|    | 300000 | 14.02  | 0.54 |         |        | 300000 | 58.41   | 1.09   |         |
|    | 400000 | 24.97  | 0.63 |         |        | 400000 | 112.36  | 1.30   |         |
|    | 500000 | 36.76  | 0.73 |         |        | 500000 | 171.14  | 1.56   |         |
|    | 600000 | 48.44  | 0.92 |         |        | 600000 | 263.33  | 1.90   |         |
|    | 700000 | 62.76  | 1.03 |         |        | 700000 | 347.20  | 2.04   |         |
|    | 800000 | 79.93  | 1.24 |         |        | 800000 | 445.32  | 2.06   |         |
|    | 900000 | 106.97 | 1.43 |         |        | 900000 | 562.56  | 1.98   |         |
| 14 | 200000 | 0.00   | 0.00 | 0.00108 | 33     | 100000 | 12.13   | 0.59   | 0.03068 |
|    | 300000 | 0.00   | 0.00 |         |        | 200000 | 43.67   | 1.06   |         |
|    | 400000 | 5.56   | 0.70 |         |        | 300000 | 109.00  | 1.29   |         |
|    | 500000 | 4.69   | 1.60 |         |        | 400000 | 195.40  | 1.59   |         |
|    | 600000 | 5.26   | 0.56 |         |        | 500000 | 321.19  | 1.82   |         |
|    | 700000 | 6.95   | 0.59 |         |        | 600000 | 457.79  | 2.04   |         |
|    | 800000 | 6.19   | 0.76 |         |        | 700000 | 648.47  | 2.11   |         |
|    | 900000 | 7.88   | 1.38 |         |        | 800000 | 899.67  | 1.92   |         |
| 15 | 400000 | 0.00   | 0.00 | 0.00046 | 34     | 900000 | 1185.95 | 1.70   | 0.08892 |
|    | 500000 | 0.00   | 0.00 |         |        | 100000 | 24.30   | 1.06   |         |
|    | 600000 | 0.00   | 0.00 |         |        | 200000 | 106.32  | 1.13   |         |
| 16 | 100000 | 0.00   | 0.00 | 0.00244 |        | 35     | 300000  | 277.92 |         |
|    | 200000 | 2.90   | 0.09 |         | 400000 |        | 495.48  | 1.46   |         |
|    | 300000 | 6.42   | 0.66 |         | 500000 |        | 837.04  | 1.71   |         |
|    | 400000 | 8.32   | 0.39 |         | 100000 |        | 0.00    | 0.00   |         |
|    | 500000 | 9.96   | 0.83 |         | 36     | 200000 | 0.00    | 0.00   | 0.00036 |
|    | 600000 | 12.08  | 0.82 |         |        | 300000 | 7.81    | 0.48   |         |
|    | 700000 | 14.69  | 0.97 |         |        | 400000 | 7.62    | 0.47   |         |
|    | 800000 | 16.06  | 1.23 |         |        | 500000 | 10.53   | 1.16   |         |
|    | 900000 | 20.34  | 1.13 |         |        | 600000 | 0.00    | 0.00   |         |
| 17 | 100000 | 5.48   | 0.17 | 0.00777 | 38     | 700000 | 0.00    | 0.00   |         |
|    | 200000 | 10.22  | 0.34 |         |        | 800000 | 0.00    | 0.00   |         |
|    | 300000 | 14.06  | 0.54 |         |        | 900000 | 0.00    | 0.00   |         |
|    | 400000 | 24.97  | 0.63 |         |        | 100000 | 9.34    | 0.22   |         |
|    | 500000 | 36.81  | 0.74 |         | 200000 | 30.04  | 0.35    |        |         |
|    | 600000 | 48.42  | 0.91 |         | 300000 | 58.17  | 0.51    |        |         |

|    |        |        |      |         |  |        |        |      |  |  |
|----|--------|--------|------|---------|--|--------|--------|------|--|--|
|    | 700000 | 62.91  | 1.03 |         |  | 400000 | 96.22  | 0.65 |  |  |
|    | 800000 | 80.35  | 1.25 |         |  | 500000 | 147.31 | 0.76 |  |  |
|    | 900000 | 107.10 | 1.43 |         |  | 600000 | 194.36 | 0.89 |  |  |
| 18 | 100000 | 5.48   | 0.17 | 0.00777 |  | 700000 | 257.96 | 0.98 |  |  |
|    | 200000 | 10.22  | 0.34 |         |  | 800000 | 333.47 | 1.11 |  |  |
|    | 300000 | 14.02  | 0.54 |         |  | 900000 | 418.94 | 1.11 |  |  |
|    | 400000 | 24.97  | 0.63 |         |  |        |        |      |  |  |
|    | 500000 | 36.92  | 0.73 |         |  |        |        |      |  |  |
|    | 600000 | 48.42  | 0.91 |         |  |        |        |      |  |  |
|    | 700000 | 62.80  | 1.04 |         |  |        |        |      |  |  |
|    | 800000 | 79.97  | 1.24 |         |  |        |        |      |  |  |
|    | 900000 | 106.89 | 1.42 |         |  |        |        |      |  |  |

### 3.1.2. Cloud map under different conditions

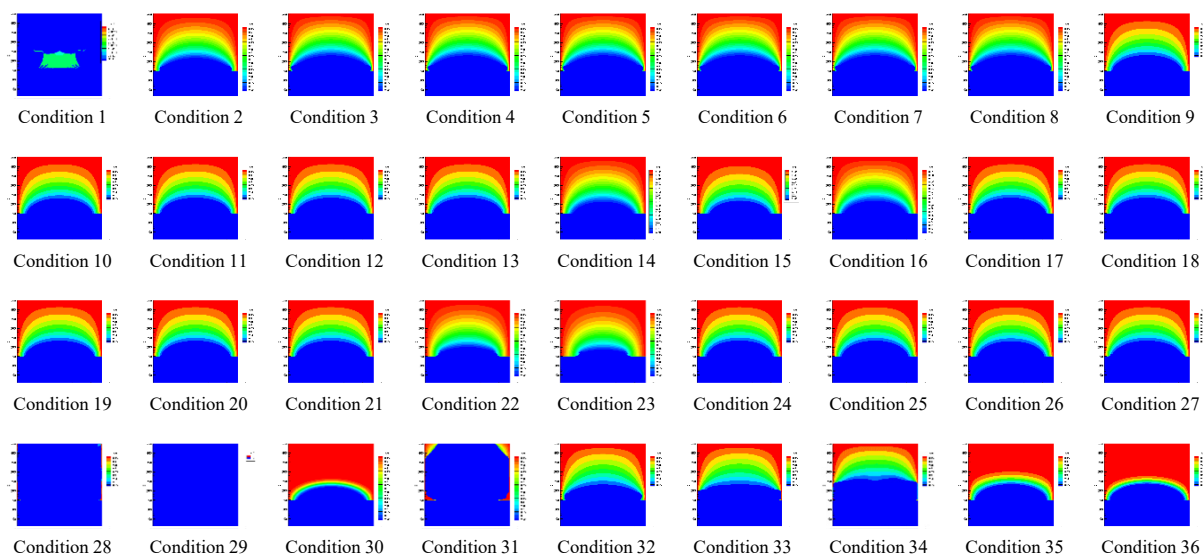

**Figure S2.** The concentration distribution of A(aq) under different conditions at time step of 500,000



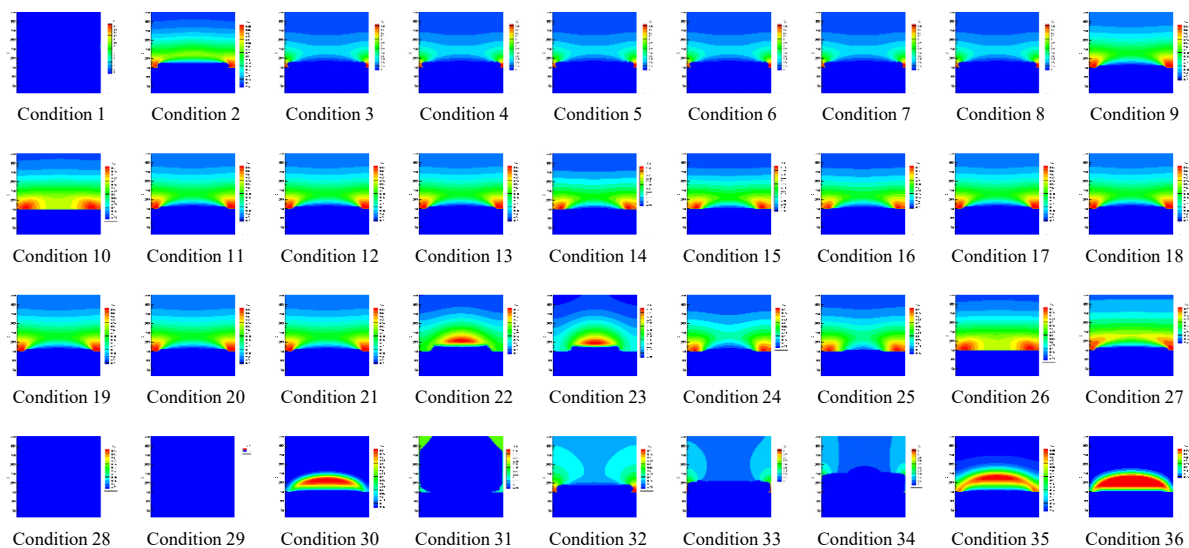

**Figure S3.** The concentration distribution of  $C(aq)$  under different conditions at time step of 500,000.

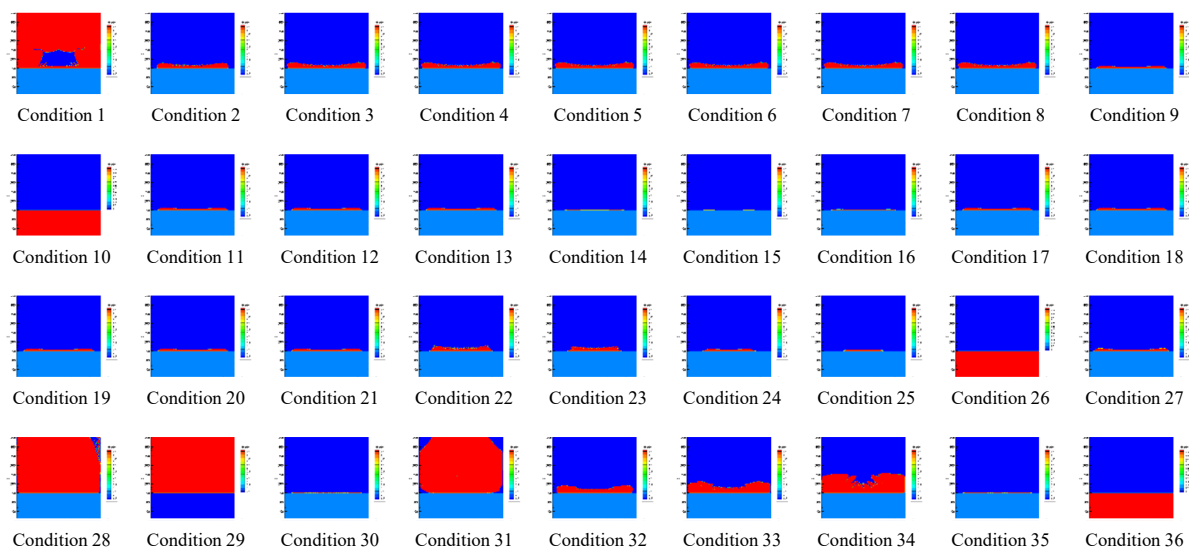

**Figure S4.** the diagram of Morphology under different conditions at the time step of 500,000.

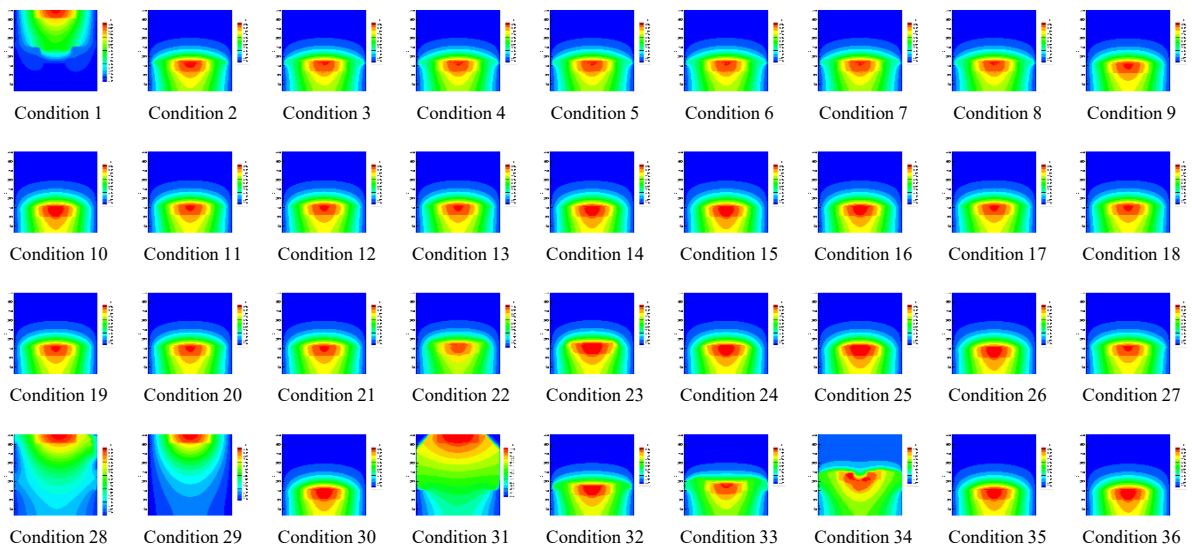

**Figure S5.** The temperature distribution under different conditions at the time step of 500,000.

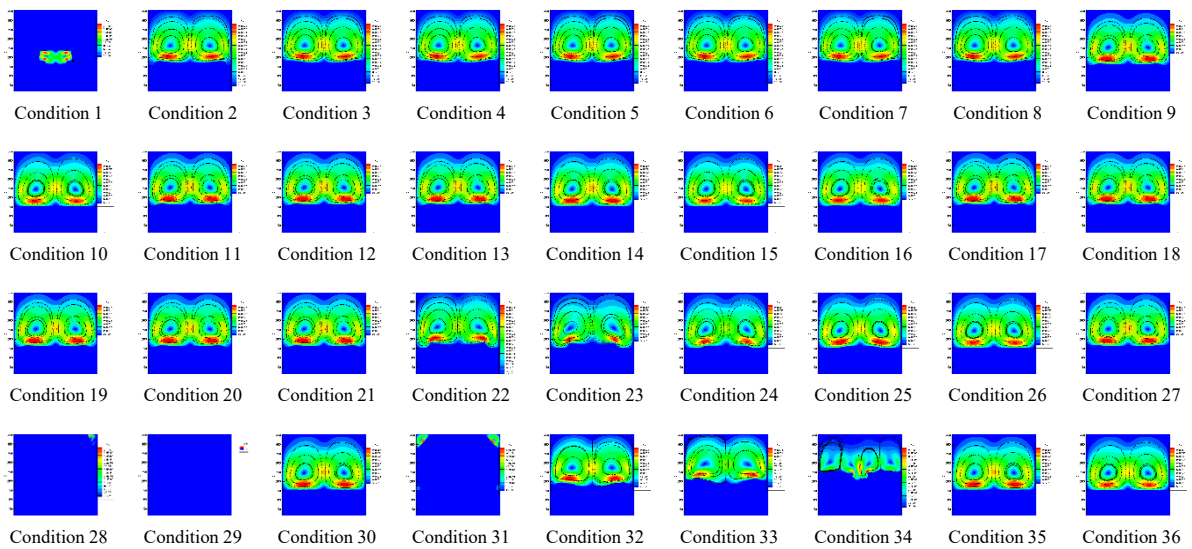

**Figure S6.** Streamlines and Velocity Contours under different conditions at the time step of 500,000.
